# Supplementary material for: An anthracene-pendant ruthenium(ii) complex conjugated to a biotin anchor, an essential handle for photo-induced anti-cancer activity
Source: Royal Society of Chemistry journal article supplement (doi:10.1039/d0nj00209g), 2020-01-01
Supplement: d0nj00209g1.pdf [file d0nj00209g1.pdf]

## SUPPORTING INFORMATION

An anthracene-pendant ruthenium(II) complex conjugated to a biotin anchor, an essential handle for photo-induced anti-cancer activity

Geângela de Fátima Sousa Oliveira,<sup>a</sup> Aryane de Azevedo Pinheiro<sup>b</sup>, Luiz Gonzaga do Nascimento Neto<sup>b,c</sup>, Mayron Alves de Vasconcelos<sup>b,d</sup>, Edson Holanda Teixeira<sup>b</sup>, Ana Claudia Silva Gondim,<sup>a</sup> Florencio Sousa Gouveia Jr<sup>a</sup>, Luiz Gonzaga de França Lopes,<sup>a</sup> Idalina Maria Moreira de Carvalho,<sup>a\*</sup> Eduardo Henrique Silva Sousa<sup>a\*</sup>

a- Group of Bioinorganic, Department of Organic and Inorganic Chemistry, Federal University of Ceará, Fortaleza, Brazil

b- Laboratório Integrado de Biomoléculas, Departamento de Patologia e Medicina Legal, Universidade Federal do Ceará, 60441-750, Fortaleza, Ceará, Brazil

c- Departamento do Núcleo Comum, Instituto Federal de Educação, Ciência e Tecnologia do Ceará, Campus Limoeiro do Norte, 62930-000, Limoeiro do Norte, Ceará, Brazil

d - Faculdade de Ciências Exatas e Naturais, Universidade do Estado do Rio Grande do Norte, 59625-620, Mossoró, Rio Grande do Norte, Brazil

\*corresponding authors: [idalina@dqoi.ufc.br](mailto:idalina@dqoi.ufc.br), [eduardohss@dqoi.ufc.br](mailto:eduardohss@dqoi.ufc.br)

**A**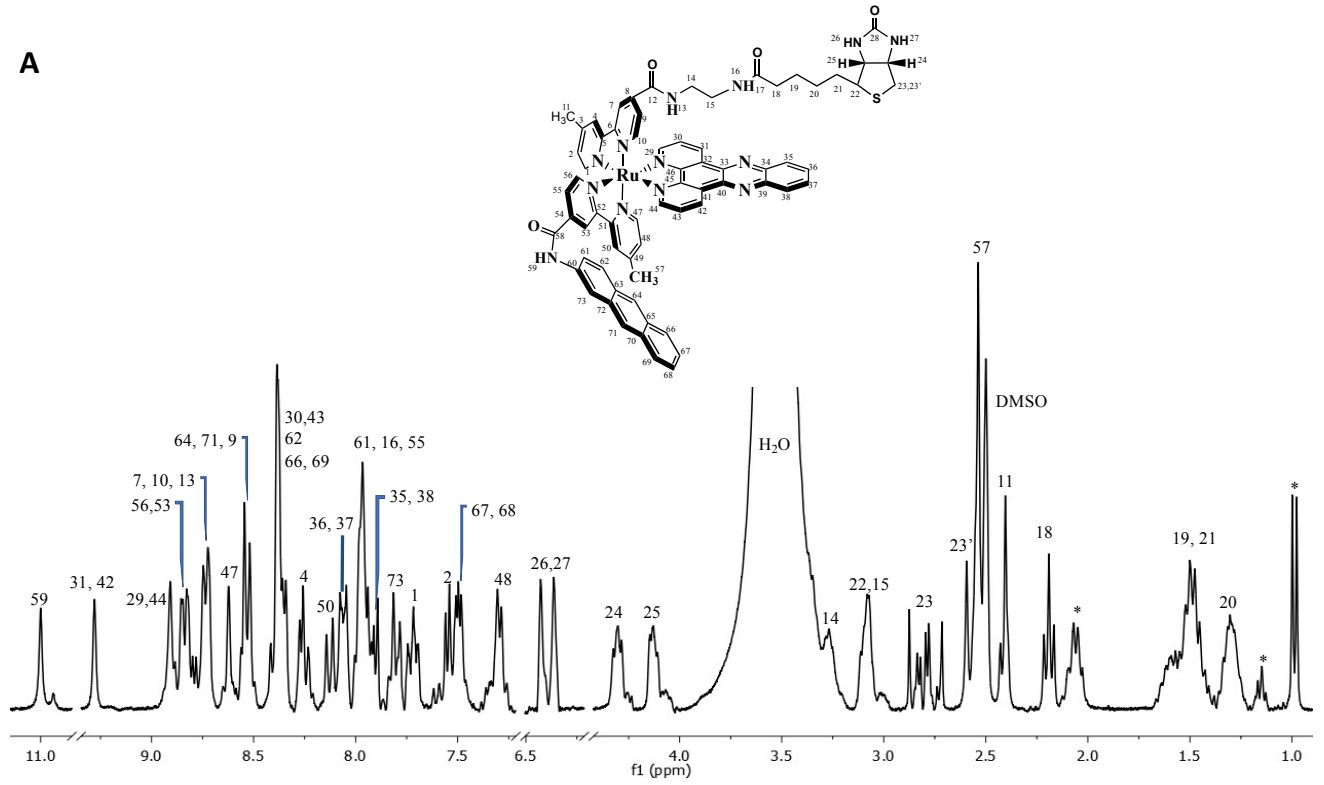**B**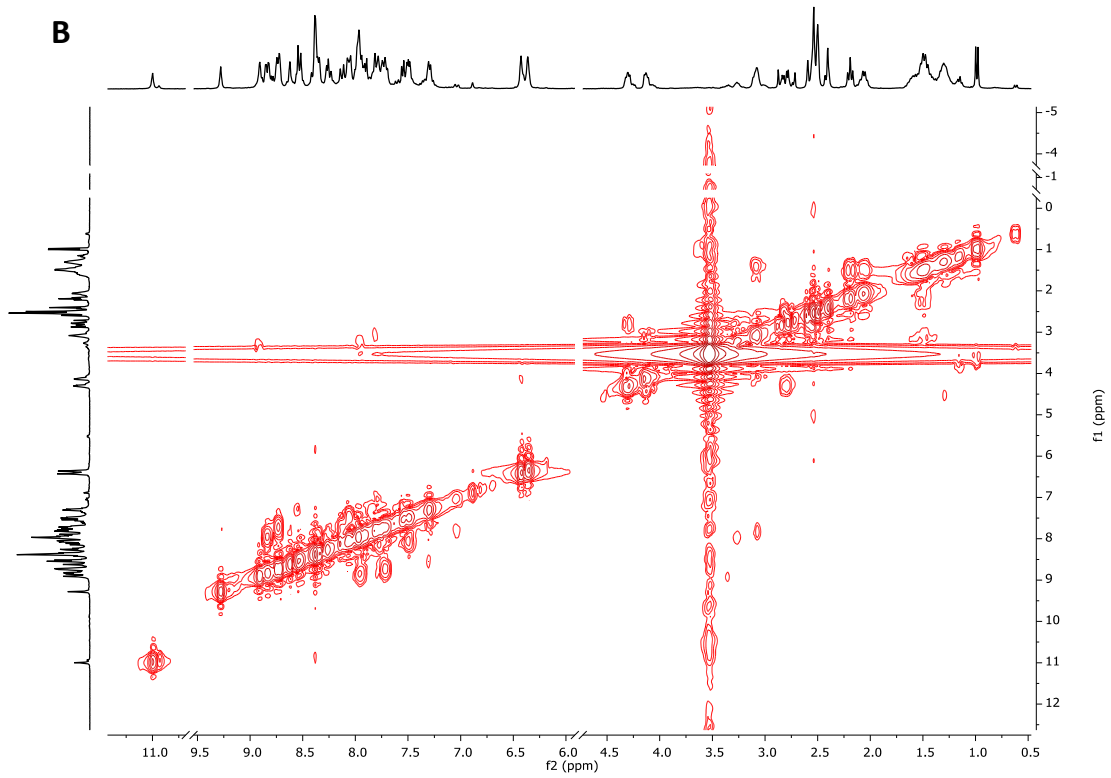

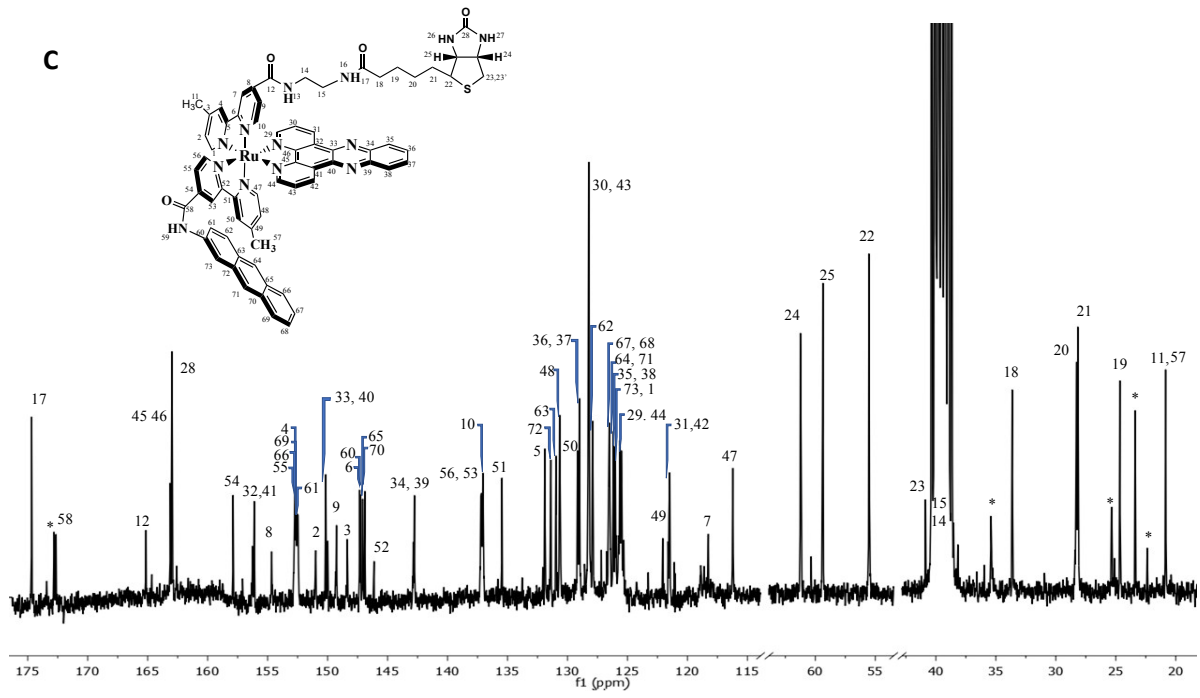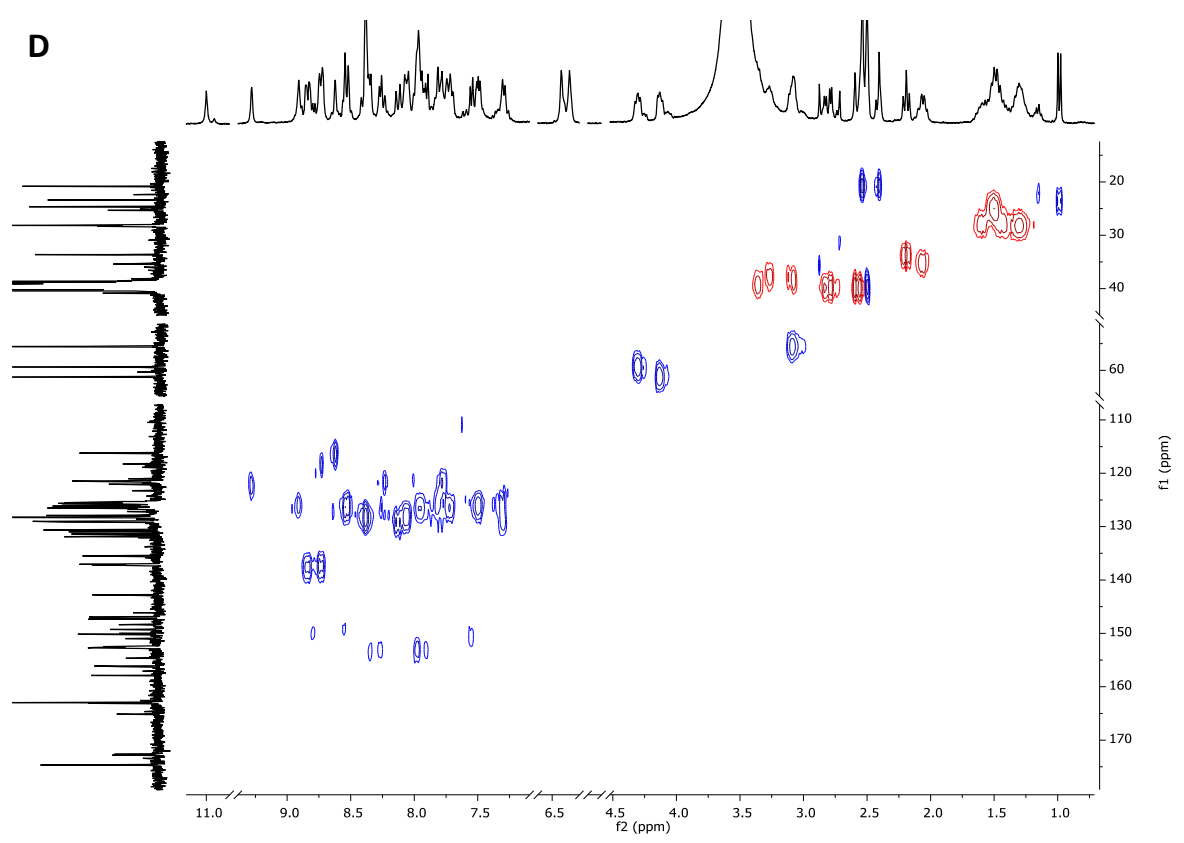

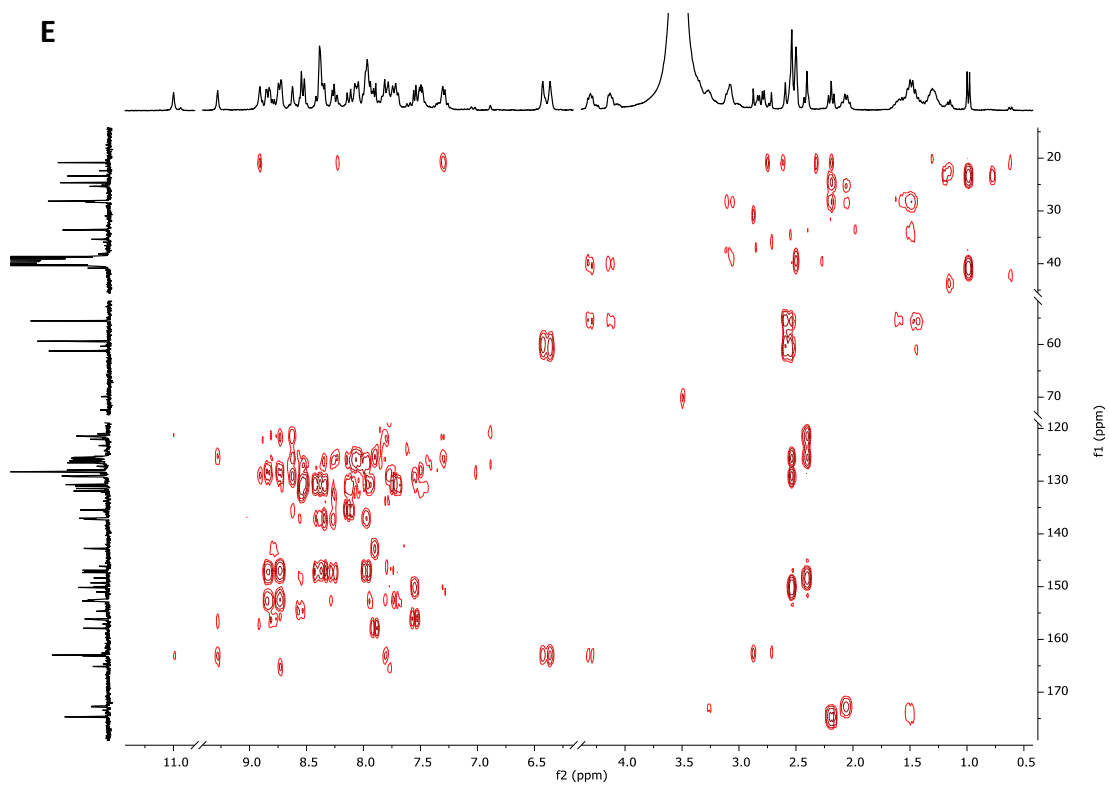

**Fig. S1.** NMR for **Ru-biot** in  $(\text{CD}_3)_2\text{SO}$  (300 MHz, 303 K).  $^1\text{H}$  NMR (**A**),  $^1\text{H}$ - $^1\text{H}$  COSY (**B**),  $^{13}\text{C}$  NMR (**C**),  $^1\text{H}$ - $^{13}\text{C}$  HSQC (**D**, red color for  $\text{CH}_2$ , and blue for  $\text{CH}$  and  $\text{CH}_3$ ),  $^1\text{H}$ - $^{13}\text{C}$  HMBC (**E**).

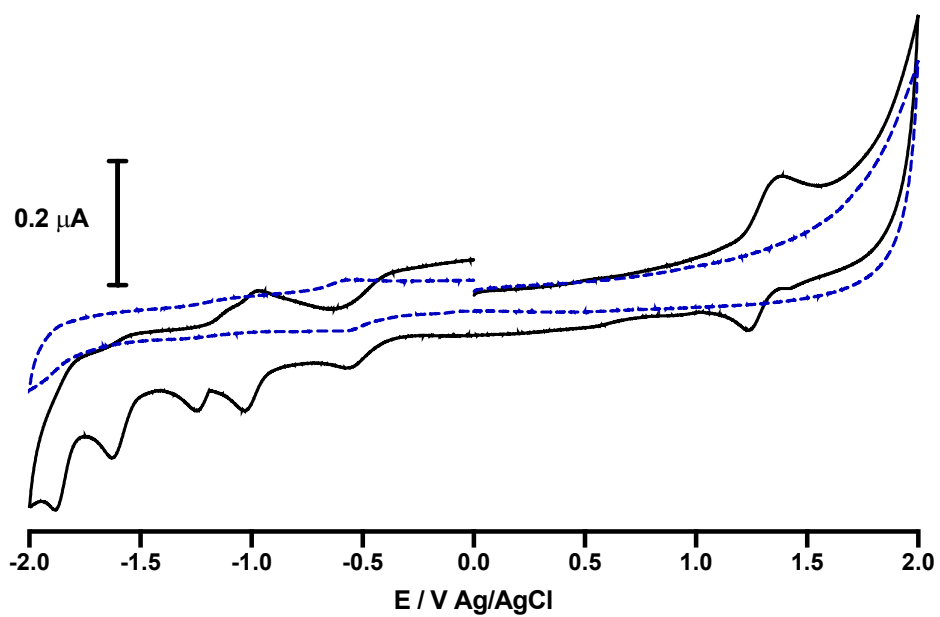

**Fig. S2.** Cyclic voltammogram of **Ru-biot** in acetonitrile (0.1 M PTBA,  $100 \text{ mV s}^{-1}$ ), initial anodic scan (blank in dashed blue line).

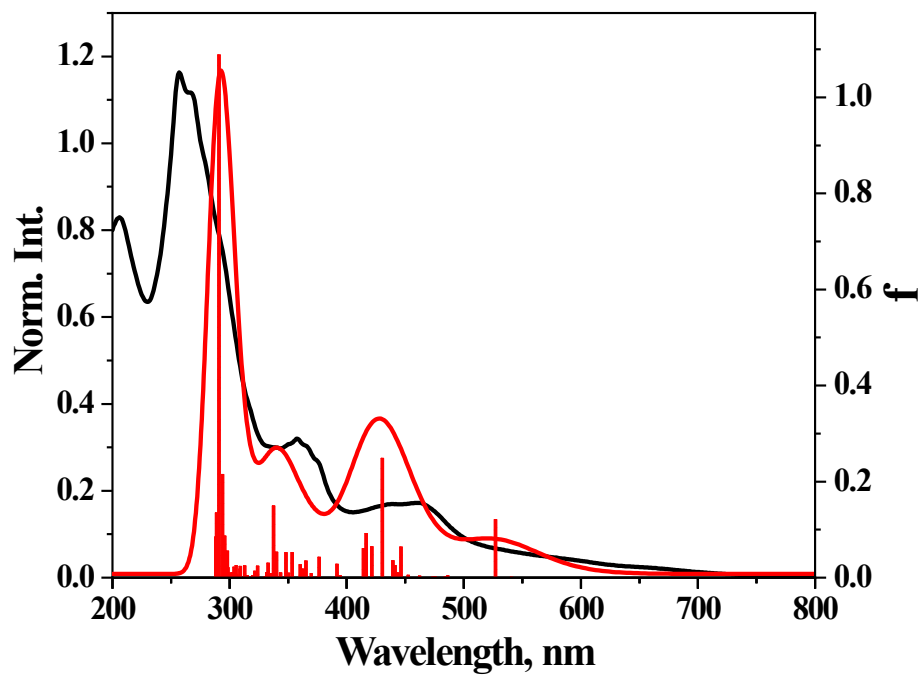

**Fig. S3.** Calculated (—) and experimental (—) electronic absorption spectra of **Ru-biot** (right side Y-axis is normalized intensity, left side is the oscillator strength)

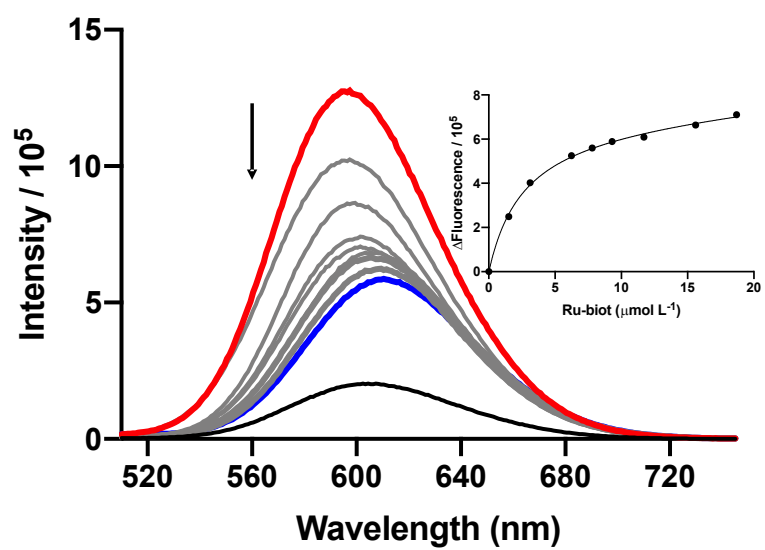

**Fig. S4.** Competition assay of ethidium bromide ( $1.5 \mu\text{mol L}^{-1}$ ) with DNA upon titration with Ru-biot (data was fit to a single binding equation, where  $K_d^{\text{app}}$  was of  $2.58 \times 10^6$ ,  $R^2 = 0.998$ ).

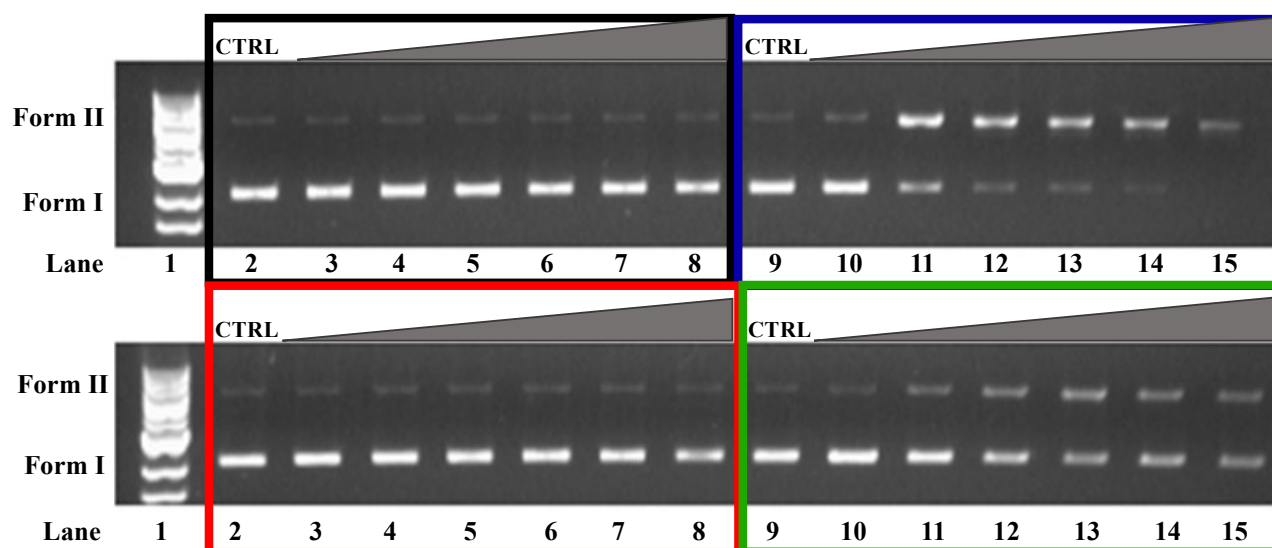

**Fig. S5.** Photocleavage of 20  $\mu$ M (in base pair) pBR322 DNA in the presence of **Ru-anth** in the dark and after 1 h of irradiation with blue, green and red LEDs. In all experiments, lane 1 contains only linear DNA ladder and lanes 2 and 9 only pBR322 DNA, while lanes 3–8 and 10–15 contained **Ru-anth** in the following concentrations of 0.3, 3.0, 7.0, 15 and 30  $\mu$ M. Dark, blue, green and red boxes indicate either the experiment was carried out in the dark or with blue, green or red-light irradiation.



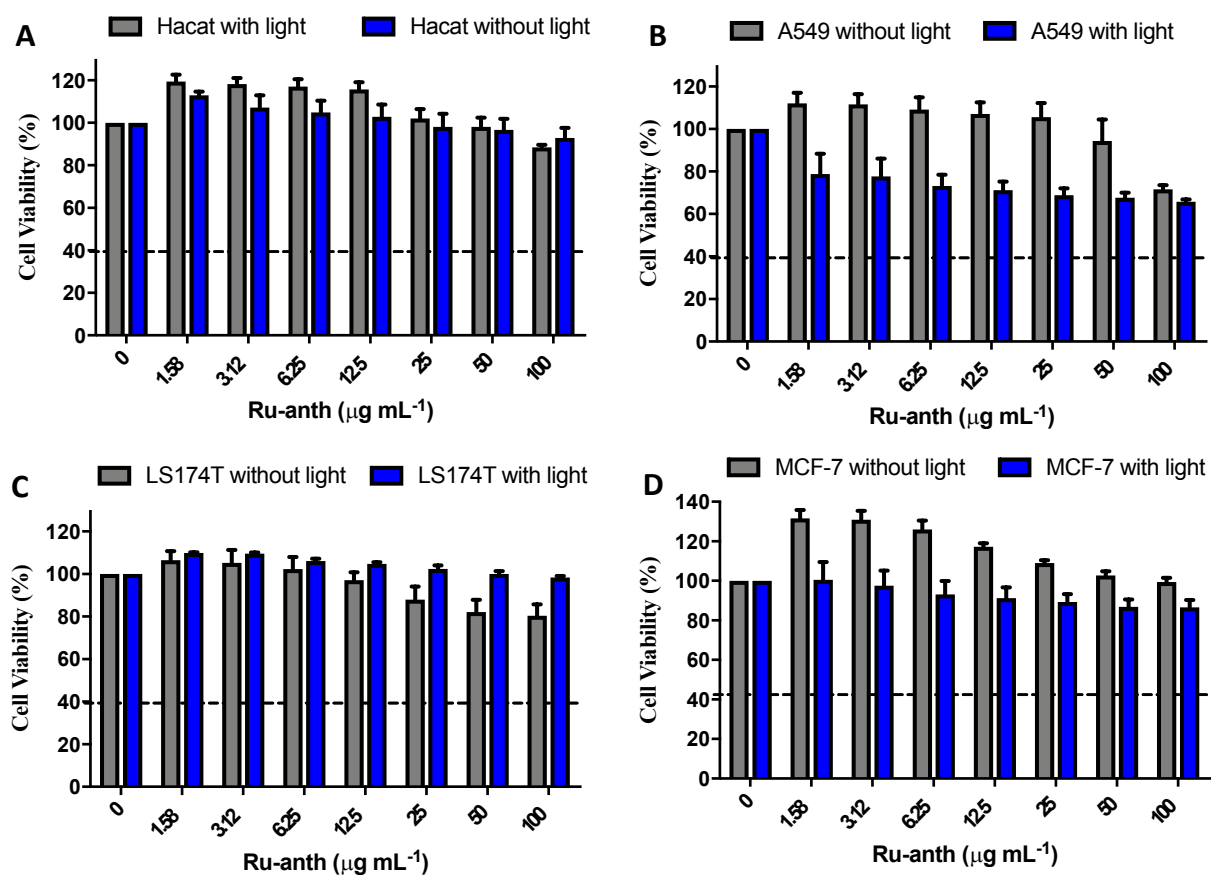

**Fig. S6.** HaCaT, A549, LS174T and MCF-7 cell viability determined by MTS assay after 48 h of treatment with **Ru-anth** in different doses, without or with blue light exposition for 1h (463 nm, 425 mW cm<sup>-2</sup>).

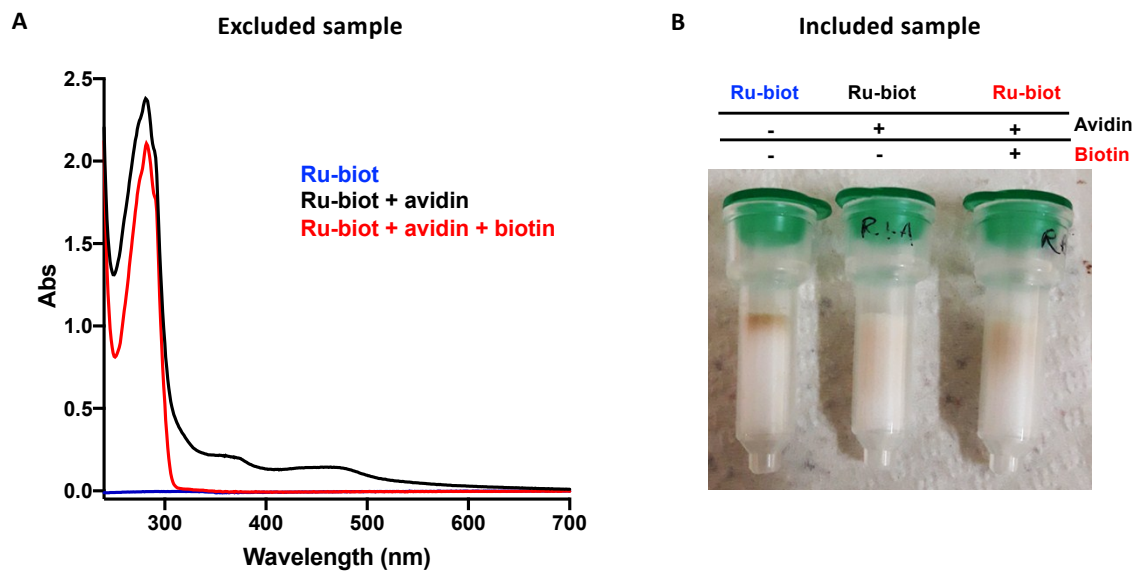

**Fig. S7.** Binding to avidin measured by using gel exclusion column. Panel A shows the electronic spectra of the excluded samples after applied onto a micro Biospin 6 column, the collected samples were from a mixture containing only Ru-biot (applied as 100  $\mu$ M) (Blue trace), Ru-biot (100  $\mu$ M) with avidin (100  $\mu$ M) (black trace), and Ru-biot (100  $\mu$ M) with avidin (100  $\mu$ M) plus biotin (1 mM) (red trace). Panel B shows the resin with the included sample right after the centrifugation, where the color observed indicates the presence of Ru-biot.

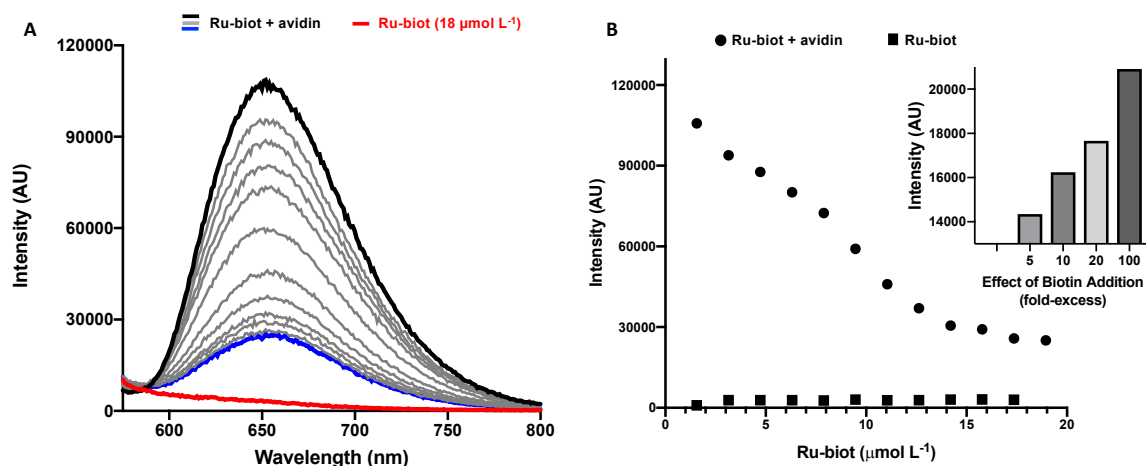

**Fig. S8.** Titration of avidin using **Ru-biot**. Panel A shows the luminescence profile during addition of **Ru-biot** into a solution containing avidin (4 μM), black trace is the emission spectrum of 1.6 μM of **Ru-biot** added, while the grey traces are further additions until the last one (19 μM) (blue trace). The red trace is the luminescence spectrum for **Ru-biot** (18 μM) without avidin. Panel B shows two sets of data, one for the titration of **Ru-biot** on a solution containing avidin (circle data) and another without avidin (squares) as monitored by luminescence (at 656 nm). Inset shows a bar plot of the changes in luminescence upon addition of an excess of biotin right after titration of avidin with **Ru-biot**.

**Table S1.** Calculated Electronic Absorption Transitions and Assignments for **Ru-biot**.

| Exptl.         | Calc.          |        |                                                                 |                                                                                                                      |      |
|----------------|----------------|--------|-----------------------------------------------------------------|----------------------------------------------------------------------------------------------------------------------|------|
| $\lambda$ (nm) | $\lambda$ (nm) | $f$    | Major contribution                                              | Character                                                                                                            |      |
| 600            | 540            | 0.0013 | HOMO $\rightarrow$ LUMO<br>(99%)                                | $\pi(\text{anth}) \rightarrow \pi^*(\text{dppz})$                                                                    | LLCT |
| 550            | 527            | 0.1207 | HOMO $\rightarrow$ L+1<br>(89%)                                 | $\pi(\text{anth}) \rightarrow \pi^*(\text{bpy})$                                                                     | ILCT |
| 457            | 430            | 0.2485 | H-4 $\rightarrow$ L+1 (46%)<br>H-3 $\rightarrow$ L+2 (28%)      | $d\pi(\text{Ru}) \rightarrow \pi^*(\text{bpy- anth})$<br>$d\pi(\text{Ru}) \rightarrow \pi^*(\text{bpy- biot})$       | MLCT |
| 437            | 416            | 0.0916 | H-4 $\rightarrow$ L+2 (23%)<br>H-3 $\rightarrow$ L+3 (30%)      | $d\pi(\text{Ru}) \rightarrow \pi^*(\text{bpy- biot})$<br>$d\pi(\text{Ru}) \rightarrow \pi^*(\text{dppz})$            | MLCT |
| 368            | 337            | 0.1493 | H-12 $\rightarrow$ LUMO<br>(59%)<br>H-9 $\rightarrow$ L+4 (21%) | $\pi(\text{dppz}) \rightarrow \pi^*(\text{dppz})$<br>$\pi(\text{dppz}) \rightarrow \pi^*(\text{dppz})$               | IL   |
| 268            | 293            | 0.2147 | H-16 $\rightarrow$ L+2 (28%)<br>H-15 $\rightarrow$ L+2 (29%)    | $\pi(\text{biotin}) \rightarrow \pi^*(\text{bpy- biot})$<br>$\pi(\text{biotin}) \rightarrow \pi^*(\text{bpy- biot})$ | IL   |

---

biot)

---

|     |     |        |                 |                                                   |    |
|-----|-----|--------|-----------------|---------------------------------------------------|----|
| 256 | 291 | 1.0885 | H-12 → LUMO     | $\pi(\text{bpy}) \rightarrow \pi^*(\text{dppz})$  |    |
|     |     |        | (13%)           | $\pi(\text{dppz}) \rightarrow \pi^*(\text{dppz})$ | IL |
|     |     |        | H-9 → L+4 (43%) |                                                   |    |

---
